# Supplementary material for: Structural isomerism of an anionic nanoporous In-MOF with interpenetrated diamond-like topology
Source: Royal Society of Chemistry journal article supplement (doi:10.1039/c2ce06538j), 2012-01-01

## Supporting Information

### ***Structural Isomerism of an Anionic Nanoporous In-MOF with Interpenetrated Diamond-Like Topology***

**Ja-Min Gu,<sup>a</sup> Sung-Jin Kim,<sup>b</sup> Youngmee Kim<sup>b,\*</sup> and Seong Huh<sup>a,\*</sup>**

<sup>a</sup> *Department of Chemistry and Protein Research Center for Bio-Industry, Hankuk University of Foreign Studies, Yongin 449-791, Korea, Fax: 82 31 330 4566; Tel: 82 31 330 4522; E-mail: shuh@hufs.ac.kr.*

<sup>b</sup> *Department of Chemistry and Nano Science, Ewha Womans University, Seoul 120-750, Korea. E-mail: ymeekim@ewha.ac.kr.*

**Table S1.** Selected bond angles around In(1) and In(2) atoms for In-MOF 1.

| Atoms    |       |          | Angle (°) |
|----------|-------|----------|-----------|
| C(114)#2 | IN(1) | C(114)#3 | 98.46(1)  |
| C(114)#3 | IN(1) | C(11)#1  | 97.96(1)  |
| C(11)#1  | IN(1) | C(11)    | 98.81(1)  |
| C(11)    | IN(1) | C(114)#2 | 97.96(1)  |
| C(21)#6  | IN(2) | C(21)    | 100.95(1) |
| C(21)    | IN(2) | C(214)#4 | 96.89(1)  |
| C(214)#4 | IN(2) | C(214)#5 | 93.12(1)  |
| C(214)#5 | IN(2) | C(21)#6  | 96.89(1)  |

#1  $-x+1/4, y, -z+1/4$     #2  $x+1/4, y+1/4, -z$     #3  $-x, y+1/4, z+1/4$   
#4  $x+1/4, -y+1, z+1/4$     #5  $-x+3/2, y-1/4, z+1/4$     #6  $-x+7/4, -y+3/4, z$   
#7  $x-1/4, y-1/4, -z$     #8  $x-1/4, -y+1, z-1/4$

**Figure S1.** Diagrams of the solvent-free In-MOF 1 along the *b*-axis (a) and *c*-axis (b). Counter-ions,  $\text{H}_2\text{N}(\text{CH}_3)_2^+$ , are represented in a CPK model without hydrogen atoms. Nitrogen atoms of  $\text{H}_2\text{N}(\text{CH}_3)_2^+$  are shown in blue spheres.

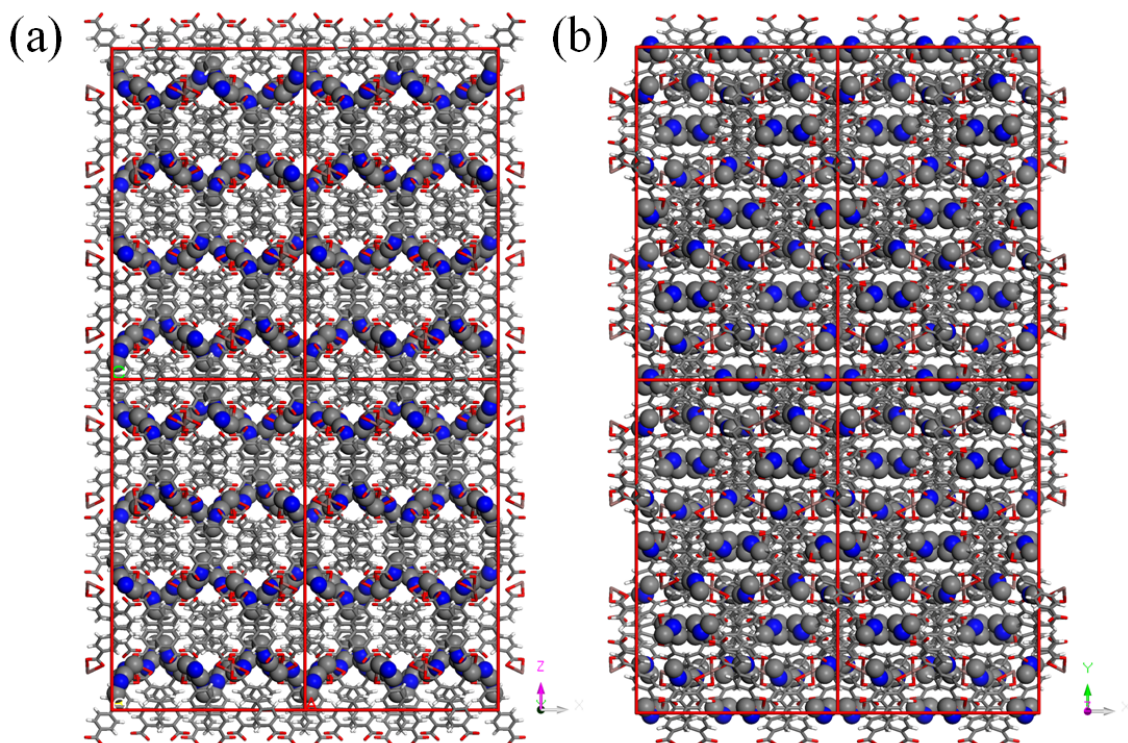

**Figure S2.** TGA profile for the as-prepared In-MOF 1.

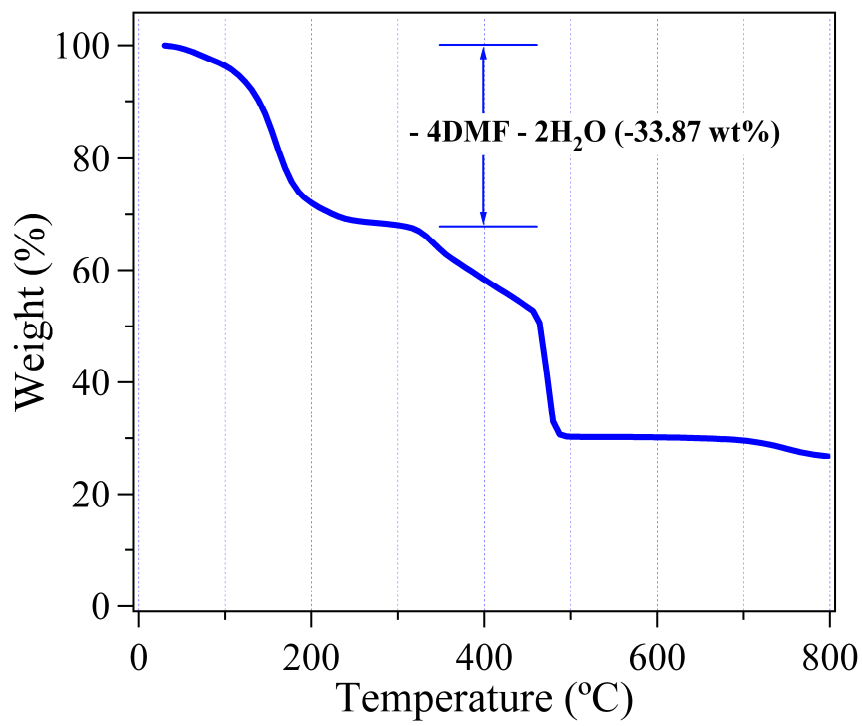

**Figure S3.** The Connolly surface of solvent-free In-MOF **1** obtained with 1.0 Å probe radius (Materials Studio 4.3, Accelrys) along the *a*-axis (a) and its 45°-rotated view along the *b*-axis (b).

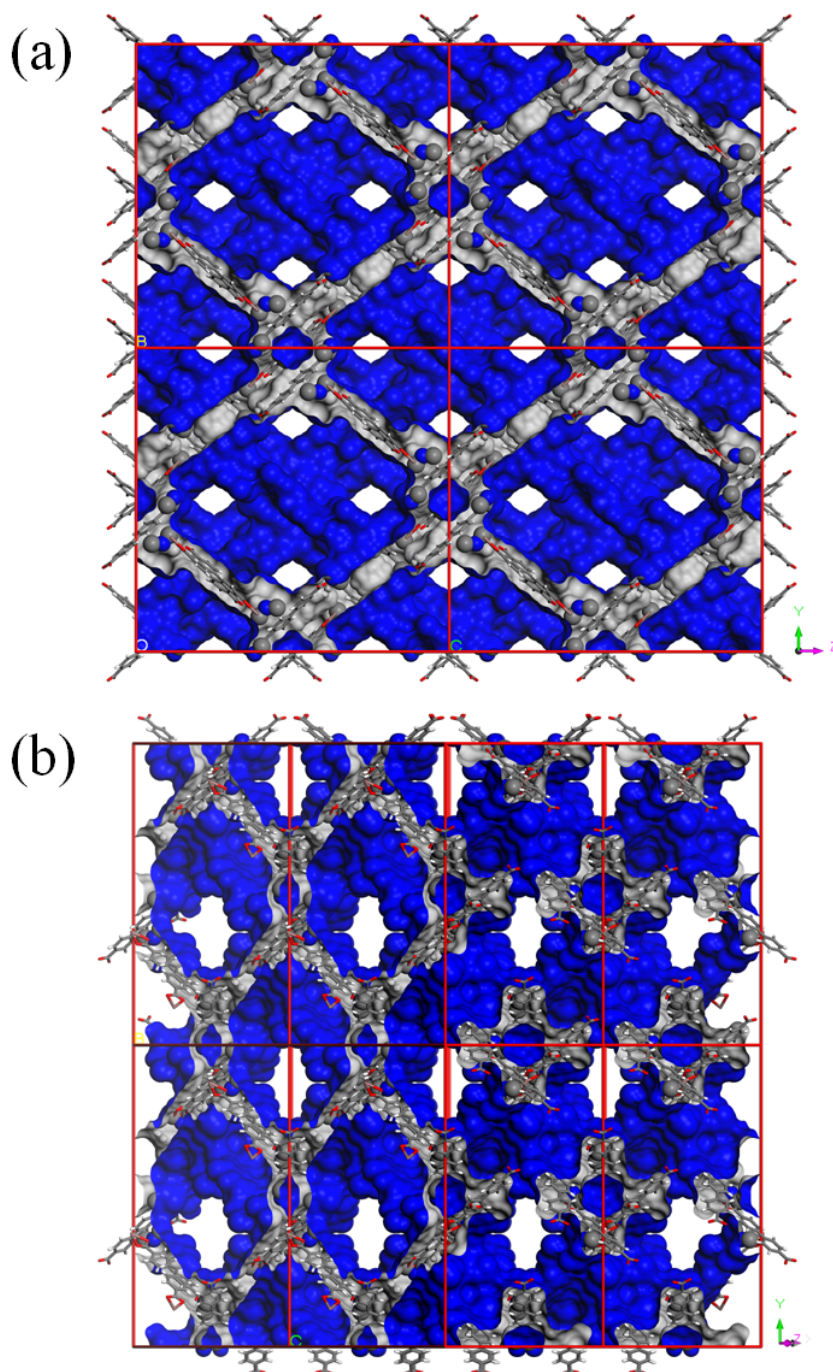

**Figure S4.** The framework structure of the AO-encapsulated In-MOF **1** along the *a*-axis. Hydrogen atoms are omitted for clarity. The unit cell dimensions of as-prepared **1** and AO-encapsulated **1** are also compared in the table.

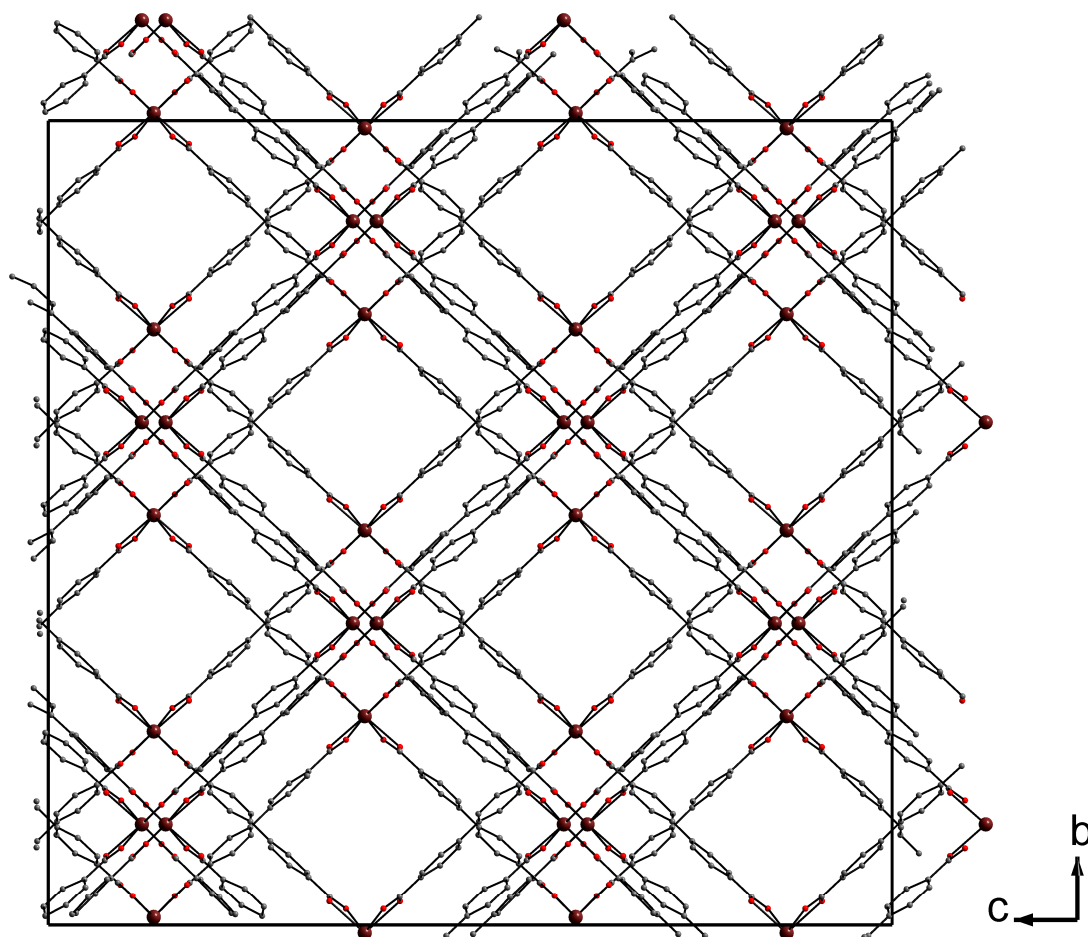

| Unit cell dimensions | As-prepared In-MOF <b>1</b> | AO-encapsulated In-MOF <b>1</b> |
|----------------------|-----------------------------|---------------------------------|
| <i>a</i>             | 23.760(5) Å                 | 23.088(3) Å                     |
| <i>b</i>             | 39.331(8) Å                 | 39.262(5) Å                     |
| <i>c</i>             | 40.610(9) Å                 | 41.133(5) Å                     |
| $\alpha$             | 90.00°                      | 90.00°                          |
| $\beta$              | 90.00°                      | 90.00°                          |
| $\gamma$             | 90.00°                      | 90.00°                          |
| Volume               | 37951(14) Å <sup>3</sup>    | 37286(8) Å <sup>3</sup>         |

**Figure S5.** Concentration dependence on the acridine orange hydrochloride (AO) encapsulation by the as-prepared In-MOF **1**. (a) Digital image of the initial ethanolic solutions of various AO concentrations. (b) Image taken after 7 d of immersion of 20 mg of the as-prepared In-MOF **1**. (c) Time course of AO encapsulation by In-MOF **1** for 1.0 mM AO solution.

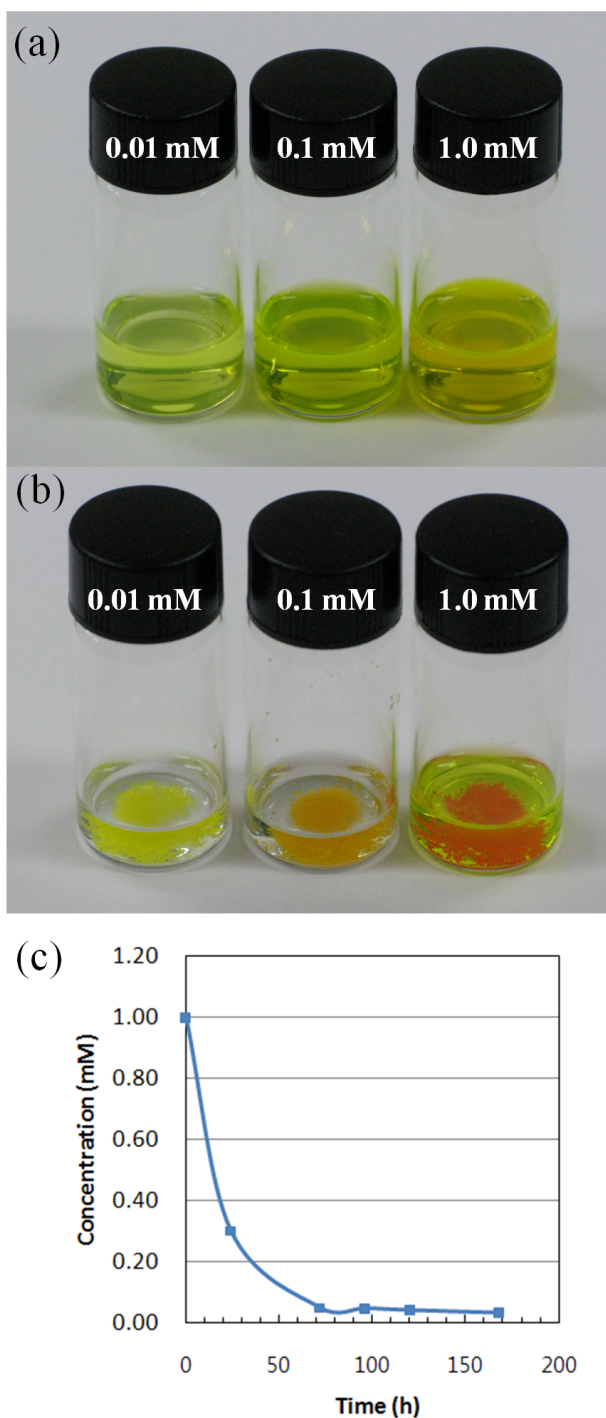

**Figure S6.** TGA profile for the as-prepared In-MOF 2.

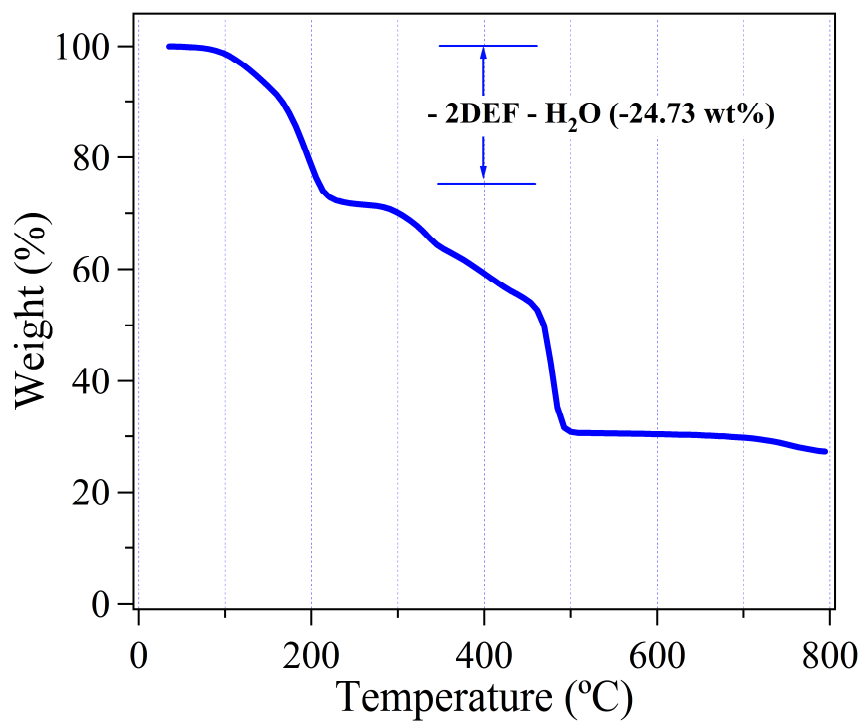

Supplement: c2ce06538j.pdf [file c2ce06538j.pdf]
